# Supplementary material for: Genomic basis of homoploid hybrid speciation within chestnut trees
Source: PubMed Central journal article supplement (PMC7338469; doi:10.1038/s41467-020-17111-w), 2020-07-06
Supplement: 41467_2020_17111_MOESM1_ESM.pdf [file 41467_2020_17111_MOESM1_ESM.pdf]

# **Genomic basis of homoploid hybrid speciation within chestnut trees**

Sun *et al.*

## **Supplementary Note 1. Nanopore sequencing and assembly**

Fresh leaves of chestnut trees were collected and used to extract high-quality genomic DNA by the CTAB method<sup>1</sup>. For Nanopore long read sequencing of the *C. mollissima* sample, the large (>20 Kb) DNAs were used directly for library construction, using a Ligation Sequencing Kit 1D (SQK-LSK108) from Oxford Nanopore and then the DNAs were sequenced on a GridION X5 sequencer. Sequencing adapters and low-quality nucleotides (if mean quality score <7) were removed.

We used two methods to assemble the Nanopore long reads (SMARTdenovo, <https://github.com/ruanjue/smartdenovo>; WTDBG, <https://github.com/ruanjue/wtdbg>). The genome sequence assembled by WTDBG was too large (870 Mb), so we discarded it. The consensus sequences produced by SMARTdenovo were further corrected by NextDenovo (<https://github.com/Nextomics/NextDenovo>) and polished by NextPolish (<https://github.com/Nextomics/NextPolish>) based on the Illumina short reads of the *C. mollissima* sample.

For Illumina short reads sequencing of the *C. mollissima* sample, we constructed paired-end libraries with an insert size of ~350 bp according to the manufacturer's standard protocol (Illumina) and carried out sequencing on the Illumina HiSeq 2500 platform to produce short reads. The raw Illumina paired-end reads were processed to remove duplications, adaptors, and low-quality bases using Super-Deduper<sup>2</sup> and Trimmomatic V0.35<sup>3</sup>, and the mate-pair reads were cleaned using NextClip V1.3.1 with default parameters<sup>4</sup>. Based on the short reads, we used k-mer frequency analysis to estimate the genome size with Jellyfish<sup>5</sup>, with a k-mer length setting of 17.

## **Supplementary Note 2. Hi-C scaffolding**

For high-throughput chromosome conformation capture (Hi-C) sequencing of the *C. mollissima* sample, fresh chestnut leaves were picked and fixed in formaldehyde (1% volume/volume [v/v]) for 10 min at room temperature. Chromatin was cross-linked then and digested using the restriction enzyme HindIII. The 5' overhangs were filled with biotinylated nucleotides, and free blunt ends were then ligated. After ligation,

cross-linking was reversed and the DNA of the *C. mollissima* sample was purified away from protein. Purified DNA of the *C. mollissima* sample was treated to remove biotin that was not internal to ligated fragments. Then, the DNA of the *C. mollissima* sample was sheared into fragment sizes of ~350 bp and sequenced using the Illumina HiSeq 2500 platform. After filtration of adapters, we removed reads of low quality (defined as: more than 5 missing bases; 17% or more bases with Phred quality score  $\leq$  15). We used bowtie V2.3.2<sup>6</sup> to align reads to the assembled contigs above. We used HiC-Pro<sup>7</sup> to evaluate the quality of Hi-C data and filter the cleaned Hi-C reads of the *C. mollissima* sample. The contigs were anchored to chromosomes using LACHESIS<sup>8</sup>, with parameters CLUSTER\_MIN\_RE\_SITES=100; CLUSTER\_MAX\_LINK\_DENSITY=2.5; CLUSTER\_NONINFORMATIVE\_RATIO=1.4; ORDER\_MIN\_N\_RES\_IN\_TRUNK=60; ORDER\_MIN\_N\_RES\_IN\_SHREDS=60.

### **Supplementary Note 3. Identification of repetitive elements**

We identified repetitive elements using a *de-novo* identification method employed in RepeatModeler v2.0 ([www.repeatmasker.org](http://www.repeatmasker.org)), and the homolog-based approach in RepeatMasker v4.0 to identify repetitive elements homologous to those in the Dfam, Repbase and RepeatPeps libraries<sup>9-11</sup>. Then, we used LTR\_Finder, LTR\_harvest and other tools in LTR\_retriever software to reannotate LTR retroelements<sup>12-14</sup>. Overlapping repetitive elements were merged with bedtools v2.28.0<sup>15</sup>.

### **Supplementary Note 4. Gene prediction**

Putative protein-coding genes were predicted following the Funannotate pipeline (<https://funannotate.readthedocs.io>). Briefly, *ab-initio* gene model predictions were carried out by Augustus v3.2<sup>16,17</sup>, Snap (<http://korflab.ucdavis.edu/>), GlimmerHMM v3<sup>18</sup> and GeneMark-ET<sup>19</sup>; homology-based gene model predictions were performed by GeMoMa<sup>20</sup> based on the published *Castanea mollissima* genome annotation. RNAseq reads (NCBI SRA accession SRR8731962) were filtered with Trimmomatic v0.35<sup>3</sup> and assembled with Trinity v2.8.5<sup>21</sup>. We used PASA (<http://pasa.sourceforge.net>), GenomeThreader<sup>22</sup> and Hisat2<sup>23</sup> to align transcripts, Uniprot-sprot protein sequences and RNAseq reads respectively. The above

predictions were then passed to EVM v1.1 to generate a set of consensus gene models<sup>24</sup>.

**Supplementary Table 1. Comparison of assembly quality for two genome assemblies of *Castanea mollissima*.**

| <b>Genome assembly statistics</b> | <b>Value<br/>(in this study)</b> | <b>Value<br/>Xing <i>et al.</i><sup>25</sup></b> |
|-----------------------------------|----------------------------------|--------------------------------------------------|
| Total length                      | 773,991,346 bp                   | 785,529,252 bp                                   |
| No. of contigs                    | 422                              | 2,707                                            |
| Longest contig length             | 41,151,384 bp                    | 6,584,328 bp                                     |
| N50 length (contigs)              | <b>5,875,430 bp</b>              | 944,461 bp                                       |
| N90 length (contigs)              | 889,749 bp                       | 133,678 bp                                       |
| Counts of N50 (contigs)           | 29                               | 235                                              |
| Counts of N90 (contigs)           | 163                              | 1,024                                            |

**Supplementary Table 2. Summary of repetitive elements identified by RepeatMasker in the *C. mollissima* genome.**

|                             | <b>Number<br/>of sequences</b> | <b>Length</b> | <b>Percent<br/>age of<br/>sequences</b> |
|-----------------------------|--------------------------------|---------------|-----------------------------------------|
| Retroelements               | 126104                         | 78123871      | 10.09                                   |
| SINEs:                      | 793                            | 97257         | 0.01                                    |
| Penelope                    | 0                              | 0             | 0.00                                    |
| LINEs:                      | 27140                          | 11538377      | 1.49                                    |
| CRE/SLACS                   | 23                             | 1085          | 0.00                                    |
| L2/CR1/Rex                  | 0                              | 0             | 0.00                                    |
| R1/LOA/Jockey               | 0                              | 0             | 0.00                                    |
| R2/R4/NeSL                  | 0                              | 0             | 0.00                                    |
| RTE/Bov-B                   | 3086                           | 778190        | 0.10                                    |
| L1/CIN4                     | 24031                          | 10759102      | 1.39                                    |
| LTR elements:               | 98171                          | 66488237      | 8.59                                    |
| BEL/Pao                     | 0                              | 0             | 0.00                                    |
| Ty1/Copia                   | 36628                          | 24585221      | 3.18                                    |
| Gypsy/DIRS1                 | 56600                          | 39221389      | 5.07                                    |
| Retroviral                  | 0                              | 0             | 0                                       |
| DNA transposons             | 102750                         | 11682993      | 1.51                                    |
| hobo-Activator              | 17831                          | 4378300       | 0.57                                    |
| Tc1-IS630-Pogo              | 1940                           | 78419         | 0.01                                    |
| En-Spm                      | 0                              | 0             | 0.00                                    |
| MuDR-IS905                  | 0                              | 0             | 0.00                                    |
| PiggyBac                    | 0                              | 0             | 0.00                                    |
| Tourist/Harbinger           | 8485                           | 1154851       | 0.15                                    |
| Rolling-circles             | 13962                          | 2554741       | 0.33                                    |
| Unclassified                | 755                            | 191250        | 0.02                                    |
| Total interspersed repeats: |                                | 89998114      | 11.63                                   |
| Small RNA:                  | 728                            | 91460         | 0.01                                    |
| Satellites:                 | 517                            | 50062         | 0.01                                    |
| Simple repeats:             | 0                              | 0             | 0.00                                    |
| Low complexity:             | 0                              | 0             | 0.00                                    |

**Supplementary Table 3. Summary of repetitive elements identified by RepeatModeler in the *C. mollissima* genome.**

|                             | <b>Number<br/>of sequences</b> | <b>Length</b> | <b>Percentage of<br/>sequences</b> |
|-----------------------------|--------------------------------|---------------|------------------------------------|
| Retroelements               | 155070                         | 172096204     | 22.23                              |
| SINEs:                      | 0                              | 0             | 0.00                               |
| Penelope                    | 0                              | 0             | 0.00                               |
| LINEs:                      | 52534                          | 29598556      | 3.82                               |
| CRE/SLACS                   | 0                              | 0             | 0.00                               |
| L2/CR1/Rex                  | 0                              | 0             | 0.00                               |
| R1/LOA/Jockey               | 0                              | 0             | 0.00                               |
| R2/R4/NeSL                  | 0                              | 0             | 0.18                               |
| RTE/Bov-B                   | 7195                           | 1400379       | 0.10                               |
| L1/CIN4                     | 44283                          | 27932016      | 3.61                               |
| LTR elements:               | 102536                         | 142497648     | 18.41                              |
| BEL/Pao                     | 121                            | 14442         | 0.00                               |
| Ty1/Copia                   | 53070                          | 55405176      | 7.16                               |
| Gypsy/DIRS1                 | 40064                          | 79401503      | 10.26                              |
| Retroviral                  | 0                              | 0             | 0                                  |
| DNA transposons             | 34503                          | 16688771      | 2.16                               |
| hobo-Activator              | 16329                          | 5214386       | 0.67                               |
| Tc1-IS630-Pogo              | 0                              | 0             | 0.00                               |
| En-Spm                      | 0                              | 0             | 0.00                               |
| MuDR-IS905                  | 0                              | 0             | 0.00                               |
| PiggyBac                    | 0                              | 0             | 0.00                               |
| Tourist/Harbinger           | 4342                           | 1896034       | 0.24                               |
| Rolling-circles             | 9661                           | 4902734       | 0.63                               |
| Unclassified                | 939284                         | 242624970     | 31.35                              |
| Total interspersed repeats: |                                | 431409945     | 55.74                              |
| Small RNA:                  | 1645                           | 553070        | 0.07                               |
| Satellites:                 | 0                              | 0             | 0.00                               |
| Simple repeats:             | 315464                         | 11138494      | 1.44                               |
| Low complexity:             | 47454                          | 2268688       | 0.29                               |

**Supplementary Table 4. Gene prediction statistics for the *C. mollissima* genome.**

| <b>Software</b> | <b>Weight</b> | <b>Number of gene models</b> |
|-----------------|---------------|------------------------------|
| August          | 1             | 34727                        |
| Augustus HiQ    | 2             | 1775                         |
| GeneMark        | 1             | 115794                       |
| GlimmerHMM      | 1             | 173919                       |
| SNAP            | 1             | 209348                       |
| PASA            | 6             | 47046                        |
| GeMoMa          | 1             | 98425                        |



**Supplementary Table 5. Summary of the functional annotation of 45011 protein coding genes in the *C. mollissima* genome.**

| Annotation database | Annotated number | Percentage (%) |
|---------------------|------------------|----------------|
| SwissProt           | 25452            | 56.55          |
| TrEMBL              | 35332            | 78.50          |
| InterPro            | 37544            | 83.41          |
| GO                  | 35630            | 79.16          |
| KEGG Pathway        | 9359             | 20.79          |
| Total               | 38928            | 86.49          |

**Supplementary Table 6. Sampling information for each *C. mollissima* tree.**

| Sample name | Latitude   | Longitude    | No. of high-confidence sites | No. of heterozygous sites | No. of missing bases | Observed heterozygosity |
|-------------|------------|--------------|------------------------------|---------------------------|----------------------|-------------------------|
| m7_1        | N31°11'59" | E116°0'38"   | 570742007                    | 3707657                   | 203249339            | 0.65%                   |
| m7_2        | N27°17'49" | E104°47'8.3" | 522308199                    | 2606089                   | 251683147            | 0.50%                   |
| m7_3        | N27°45'26" | E106°49'15"  | 562017772                    | 3778988                   | 211973574            | 0.67%                   |
| m7_4        | N26°59'11" | E106°28'42"  | 532302924                    | 3501721                   | 241688422            | 0.66%                   |
| m7_5        | N31°44'2"  | E109°38'37"  | 552102008                    | 3809841                   | 221889338            | 0.69%                   |
| m7_6        | N31°43'44" | E109°45'12"  | 545413068                    | 3818000                   | 228578278            | 0.70%                   |
| m7_7        | N31°59'2"  | E110°13'12"  | 552132054                    | 3957800                   | 221859292            | 0.72%                   |
| m7_8        | N31°52'35" | E110°36'5"   | 541691204                    | 3990168                   | 232300142            | 0.74%                   |
| m7_9        | N30°44'12" | E110°18'52"  | 541917546                    | 3834239                   | 232073800            | 0.71%                   |
| m7_10       | N27°38'44" | E109°49'46"  | 550499295                    | 3707115                   | 223492051            | 0.67%                   |
| m7_11       | N29°25'40" | E110°58'58"  | 560352866                    | 3869141                   | 213638480            | 0.69%                   |
| m7_12       | N29°3'11"  | E113°32'14"  | 591563995                    | 3722198                   | 182427351            | 0.63%                   |
| m7_13       | N26°8'4"   | E113°48'32"  | 554861054                    | 3694940                   | 219130292            | 0.67%                   |
| m7_14       | N25°30'21" | E113°54'51"  | 529580541                    | 3297121                   | 244410805            | 0.62%                   |
| m7_15       | N27°24'51" | E109°58'55"  | 548403007                    | 3573249                   | 225588339            | 0.65%                   |
| m7_16       | N31°18'7"  | E119°40'15"  | 547400705                    | 3685792                   | 226590641            | 0.67%                   |
| m7_17       | N28°16'41" | E113°37'43"  | 557025720                    | 3396141                   | 216965626            | 0.61%                   |
| m7_18       | N28°38'60" | E114°54'7"   | 552877733                    | 3743615                   | 221113613            | 0.68%                   |
| m7_19       | N29°14'10" | E117°54'32"  | 592970264                    | 3895654                   | 181021082            | 0.66%                   |
| m7_20       | N26°10'25" | E114°33'22"  | 566265530                    | 3720066                   | 207725816            | 0.66%                   |
| m7_21       | N23°11'54" | E104°52'12"  | 539418831                    | 3359302                   | 234572515            | 0.62%                   |
| m7_22       | 30°26'4"   | E119°35'13"  | 545270958                    | 3547029                   | 228720388            | 0.65%                   |
| m7_23       | N29°0'20"  | E120°31'9"   | 588299158                    | 3647102                   | 185692188            | 0.62%                   |
| m7_24       | N27°52'04" | E119°49'40"  | 541353389                    | 3624997                   | 232637957            | 0.67%                   |
| m7_25       | N31°57'39" | E108°35'13"  | 555839860                    | 3655137                   | 218151486            | 0.66%                   |
| m7_26       | N31°48'39" | E109°04'26"  | 545212445                    | 3728296                   | 228778901            | 0.68%                   |
| m7_27       | N33°54'49" | E105°59'40"  | 565916720                    | 4067957                   | 208074626            | 0.72%                   |
| m7_28       | N33°54'49" | E105°59'40"  | 549536838                    | 3690186                   | 224454508            | 0.67%                   |
| m7_29       | N27°53'10" | E108°47'48"  | 584870016                    | 3396872                   | 189121330            | 0.58%                   |
| m7_30       | N27°53'10" | E108°47'48"  | 560264444                    | 3793601                   | 213726902            | 0.68%                   |
| m7_31       | N26°13'59" | E107°55'08"  | 553333070                    | 3769171                   | 220658276            | 0.68%                   |
| m7_32       | N26°13'59" | E107°55'08"  | 519097967                    | 3384447                   | 254893379            | 0.65%                   |
| m7_33       | N26°26'36" | E111°0'26"   | 559469681                    | 3690586                   | 214521665            | 0.66%                   |
| m7_34       | N26°26'36" | E111°0'26"   | 558588069                    | 3933412                   | 215403277            | 0.70%                   |
| m7_35       | N33°22'21" | E106°12'21"  | 517962008                    | 3327264                   | 256029338            | 0.64%                   |
| m7_36       | N33°22'21" | E106°12'21"  | 547324730                    | 3795303                   | 226666616            | 0.69%                   |
| m7_37       | N29°35'16" | E103°17'18"  | 545449456                    | 3707953                   | 228541890            | 0.68%                   |
| m7_38       | N29°35'16" | E103°17'18"  | 545809790                    | 3196931                   | 228181556            | 0.59%                   |
| m7_39       | N31°16'18" | E115°59'38"  | 537191914                    | 3909693                   | 236799432            | 0.73%                   |
| m7_40       | N31°16'18" | E115°59'38"  | 557332786                    | 3880544                   | 216658560            | 0.70%                   |
| m7_41       | N27°17'    | E104°47'     | 570601025                    | 3732892                   | 203390321            | 0.65%                   |
| m7_42       | N27°45'    | E106°49'     | 547772612                    | 3739079                   | 226218734            | 0.68%                   |
| m7_43       | N32°52'51" | E107°49'60"  | 571101787                    | 3858436                   | 202889559            | 0.68%                   |

**Supplementary Table 7. Sampling information for each *C. henryi* var. *henryi* tree.**

| <b>Sample name</b> | <b>Latitude</b> | <b>Longitude</b> | <b>No. of high-confidence sites</b> | <b>No. of heterozygous sites</b> | <b>No. of missing bases</b> | <b>Observed heterozygosity</b> |
|--------------------|-----------------|------------------|-------------------------------------|----------------------------------|-----------------------------|--------------------------------|
| h7_01              | N26°39'43"      | E117°33'49"      | 461373964                           | 3672669                          | 312617382                   | 0.80%                          |
| h7_02              | N26°39'43"      | E117°33'49"      | 449710156                           | 3447569                          | 324281190                   | 0.77%                          |
| h7_03              | N26°39'43"      | E117°33'49"      | 471016087                           | 3550445                          | 302975259                   | 0.75%                          |
| h7_04              | N28°1'26"       | E108°45'52"      | 468509572                           | 4401177                          | 305481774                   | 0.94%                          |
| h7_05              | N28°1'26"       | E108°45'52"      | 440516104                           | 3862828                          | 333475242                   | 0.88%                          |
| h7_06              | N26°19'31"      | E108°1'18"       | 450599087                           | 4019797                          | 323392259                   | 0.89%                          |
| h7_07              | N26°19'31"      | E108°1'18"       | 445825050                           | 3780122                          | 328166296                   | 0.85%                          |
| h7_08              | N26°19'31"      | E108°1'18"       | 459317726                           | 4262963                          | 314673620                   | 0.93%                          |
| h7_09              | N31°52'35"      | E110°36'5"       | 464782833                           | 3876914                          | 309208513                   | 0.83%                          |
| h7_10              | N31°52'35"      | E110°36'5"       | 451847271                           | 4299011                          | 322144075                   | 0.95%                          |
| h7_11              | N30°43'54"      | E110°18'16"      | 444465736                           | 4015897                          | 329525610                   | 0.90%                          |
| h7_12              | N30°43'54"      | E110°18'16"      | 438690134                           | 3412361                          | 335301212                   | 0.78%                          |
| h7_13              | N29°0'38"       | E109°55'06"      | 490293641                           | 4315259                          | 283697705                   | 0.88%                          |
| h7_14              | N29°25'40"      | E110°58'58"      | 448518559                           | 4297723                          | 325472787                   | 0.96%                          |
| h7_15              | N29°3'11"       | E113°32'14"      | 489371990                           | 4147459                          | 284619356                   | 0.85%                          |
| h7_16              | N28°16'41"      | E113°37'43"      | 448871955                           | 4150474                          | 325119391                   | 0.92%                          |
| h7_17              | N26°8'4"        | E113°48'32"      | 460558849                           | 3668762                          | 313432497                   | 0.80%                          |
| h7_18              | N26°26'36"      | E111°0'26"       | 459906471                           | 3838423                          | 314084875                   | 0.83%                          |
| h7_19              | N27°24'51"      | E109°58'55"      | 454162952                           | 4293360                          | 319828394                   | 0.95%                          |
| h7_20              | N28°40'2"       | E114°44'7"       | 490685985                           | 3886581                          | 283305361                   | 0.79%                          |
| h7_21              | N30°26'4"       | E119°35'13"      | 443667662                           | 3590636                          | 330323684                   | 0.81%                          |
| h7_22              | N29°0'20"       | E120°31'9"       | 445924953                           | 3872337                          | 328066393                   | 0.87%                          |
| h7_23              | N27°52'30"      | E119°08'25.6"    | 462631380                           | 2712473                          | 311359966                   | 0.59%                          |
| h7_24              | N31°48'39"      | E109°04'26"      | 446025357                           | 3744315                          | 327965989                   | 0.84%                          |

**Supplementary Table 8. Sampling information for each *C. henryi* var. *omeiensis* tree.**

| Sample name | Latitude   | Longitude   | No. of high-confidence sites | No. of heterozygous sites | No. of missing bases | Observed heterozygosity |
|-------------|------------|-------------|------------------------------|---------------------------|----------------------|-------------------------|
| o7_1        | N29°35'16" | E103°17'18" | 479040224                    | 6628868                   | 294951122            | 1.38%                   |
| o7_2        | N29°35'22" | E103°22'56" | 464410264                    | 4144702                   | 309581082            | 0.89%                   |
| o7_3        | N29°35'23" | E103°22'57" | 472241836                    | 4530186                   | 301749510            | 0.96%                   |
| o7_4        | N29°35'24" | E103°22'58" | 460641015                    | 4085421                   | 313350331            | 0.89%                   |
| o8_01       | N29°34'44" | E103°23'11" | 477735054                    | 4804066                   | 296256292            | 1.01%                   |
| o8_02       | N29°34'44" | E103°23'11" | 450372499                    | 4016571                   | 323618847            | 0.89%                   |
| o8_03       | N29°34'44" | E103°23'11" | 472864333                    | 4391174                   | 301127013            | 0.93%                   |
| o8_04       | N29°34'44" | E103°23'11" | 464350640                    | 4240950                   | 309640706            | 0.91%                   |
| o8_05       | N29°34'56" | E103°23'06" | 508629818                    | 7909021                   | 265361528            | 1.55%                   |
| o8_06       | N29°34'56" | E103°23'06" | 465639951                    | 4377841                   | 308351395            | 0.94%                   |
| o8_07       | N29°34'56" | E103°23'06" | 456802111                    | 3922734                   | 317189235            | 0.86%                   |
| o8_08       | N29°34'56" | E103°23'06" | 462240844                    | 4373510                   | 311750502            | 0.95%                   |
| o8_09       | N29°34'56" | E103°23'06" | 462680989                    | 4123521                   | 311310357            | 0.89%                   |
| o8_10       | N29°35'12" | E103°22'59" | 453760082                    | 3945910                   | 320231264            | 0.87%                   |
| o8_11       | N29°35'12" | E103°22'59" | 397162243                    | 3816785                   | 376829103            | 0.96%                   |
| o8_12       | N29°35'12" | E103°22'59" | 469303626                    | 5866881                   | 304687720            | 1.25%                   |
| o8_13       | N29°35'22" | E103°22'56" | 439380481                    | 3966063                   | 334610865            | 0.90%                   |
| o8_14       | N29°35'22" | E103°22'56" | 515221031                    | 8722588                   | 258770315            | 1.69%                   |
| o8_15       | N29°35'22" | E103°22'56" | 460882909                    | 3725157                   | 313108437            | 0.81%                   |
| o8_16       | N29°35'16" | E103°17'18" | 510769536                    | 7041891                   | 263221810            | 1.38%                   |

**Supplementary Table 9. Sampling information for each *C. seguinii* tree.**

| <b>Sample name</b> | <b>Latitude</b> | <b>Longitude</b> | <b>No. of high-confidence sites</b> | <b>No. of heterozygous sites</b> | <b>No. of missing bases</b> | <b>Observed heterozygosity</b> |
|--------------------|-----------------|------------------|-------------------------------------|----------------------------------|-----------------------------|--------------------------------|
| s7_01              | N27°28'50"      | E104°51'2"       | 491002223                           | 3567482                          | 282989123                   | 0.73%                          |
| s7_02              | N27°28'50"      | E104°51'2"       | 492370576                           | 3686093                          | 281620770                   | 0.75%                          |
| s7_03              | N30°54'5"       | E116°16'14"      | 474634420                           | 3983384                          | 299356926                   | 0.84%                          |
| s7_04              | N31°11'59"      | E116°0'38"       | 489102692                           | 4106887                          | 284888654                   | 0.84%                          |
| s7_05              | N31°16'18"      | E115°59'38"      | 474160345                           | 4067299                          | 299831001                   | 0.86%                          |
| s7_06              | N29°28'20"      | E118°9'4"        | 490313162                           | 3960697                          | 283678184                   | 0.81%                          |
| s7_07              | N26°40'7.7"     | E104°46'5.6"     | 491543074                           | 3887879                          | 282448272                   | 0.79%                          |
| s7_08              | N27°45'26"      | E106°49'15"      | 490950378                           | 4366180                          | 283040968                   | 0.89%                          |
| s7_09              | N27°45'26"      | E106°49'15"      | 509620360                           | 5473503                          | 264370986                   | 1.07%                          |
| s7_10              | N25°52'43"      | E106°13'32"      | 501537000                           | 4281769                          | 272454346                   | 0.85%                          |
| s7_11              | N26°13'59"      | E107°55'08"      | 490250460                           | 5950090                          | 283740886                   | 1.21%                          |
| s7_12              | N26°19'31"      | E108°1'18"       | 473258703                           | 3897652                          | 300732643                   | 0.82%                          |
| s7_13              | N31°49'3"       | E114°4'42"       | 492477340                           | 4147051                          | 281514006                   | 0.84%                          |
| s7_14              | N31°49'3"       | E114°4'42"       | 481313562                           | 4011638                          | 292677784                   | 0.83%                          |
| s7_15              | N29°3'54"       | E113°35'26"      | 494875509                           | 3693239                          | 279115837                   | 0.75%                          |
| s7_16              | N25°31'51"      | E113°27'30"      | 480053586                           | 4005889                          | 293937760                   | 0.83%                          |
| s7_17              | N26°30'17"      | E110°56'29"      | 512595931                           | 5818045                          | 261395415                   | 1.14%                          |
| s7_18              | N26°30'17"      | E110°56'29"      | 498034642                           | 4709612                          | 275956704                   | 0.95%                          |
| s7_19              | N31°16'58"      | E119°46'55"      | 496668952                           | 4716012                          | 277322394                   | 0.95%                          |
| s7_20              | N28°16'41"      | E113°37'43"      | 500777481                           | 4065136                          | 273213865                   | 0.81%                          |
| s7_21              | N28°40'2"       | E114°44'7"       | 490733281                           | 4318669                          | 283258065                   | 0.88%                          |
| s7_22              | N28°38'60"      | E115°7'53"       | 478310769                           | 3850703                          | 295680577                   | 0.81%                          |
| s7_23              | N26°30'27"      | E116°15'37"      | 510335136                           | 4511877                          | 263656210                   | 0.88%                          |
| s7_24              | N26°10'25"      | E114°33'22"      | 494328988                           | 4091157                          | 279662358                   | 0.83%                          |
| s7_25              | N30°26'4"       | E119°35'13"      | 496135014                           | 4133930                          | 277856332                   | 0.83%                          |
| s7_26              | N29°0'20"       | E120°31'9"       | 504595071                           | 4485771                          | 269396275                   | 0.89%                          |
| s7_27              | N29°0'20"       | E120°31'9"       | 498362011                           | 5005579                          | 275629335                   | 1.00%                          |
| s7_28              | N30°44'12"      | E110°18'52"      | 500004423                           | 4316463                          | 273986923                   | 0.86%                          |

**Supplementary Table 10. Mutation matrices for *C. mollissima* following the method of Chan *et al.*<sup>26</sup>.**

|          | <b>A</b> | <b>C</b> | <b>G</b> | <b>T</b> |
|----------|----------|----------|----------|----------|
| <b>A</b> | 0.673148 | 0.053624 | 0.17474  | 0.098488 |
| <b>C</b> | 0.18217  | 0.00065  | 0.07571  | 0.741469 |
| <b>G</b> | 0.741269 | 0.076225 | 0        | 0.182506 |
| <b>T</b> | 0.099325 | 0.175132 | 0.053945 | 0.671598 |

**Supplementary Table 11. AIC scores of model A and B.**

| Duplicate code | AIC                               |                                      |
|----------------|-----------------------------------|--------------------------------------|
|                | Model A<br>( $M_{hm} < M_{anc}$ ) | Model B<br>( $M_{hm} \geq M_{anc}$ ) |
| duplicate 1    | 13541420                          | 21421351                             |
| duplicate 2    | 13545533                          | 21870169                             |
| duplicate 3    | 13547745                          | 18625330                             |
| duplicate 4    | 13555198                          | 18320133                             |
| duplicate 5    | 13555547                          | 16283226                             |
| duplicate 6    | 13559190                          | 17000360                             |
| duplicate 7    | 13563053                          | 21452227                             |
| duplicate 8    | 13563053                          | 21452227                             |
| duplicate 9    | 13565076                          | 20675993                             |
| duplicate 10   | 13565099                          | 16215901                             |
| duplicate 11   | 13565099                          | 16215901                             |
| duplicate 12   | 13568960                          | 21574060                             |
| duplicate 13   | 13568960                          | 21574060                             |
| duplicate 14   | 13569722                          | 15891021                             |
| duplicate 15   | 13569722                          | 15891021                             |
| duplicate 16   | 13570588                          | 21723945                             |
| duplicate 17   | 13576897                          | 21738839                             |
| duplicate 18   | 13576897                          | 21738839                             |
| duplicate 19   | 13577305                          | 15929488                             |
| duplicate 20   | 13579794                          | 16164942                             |

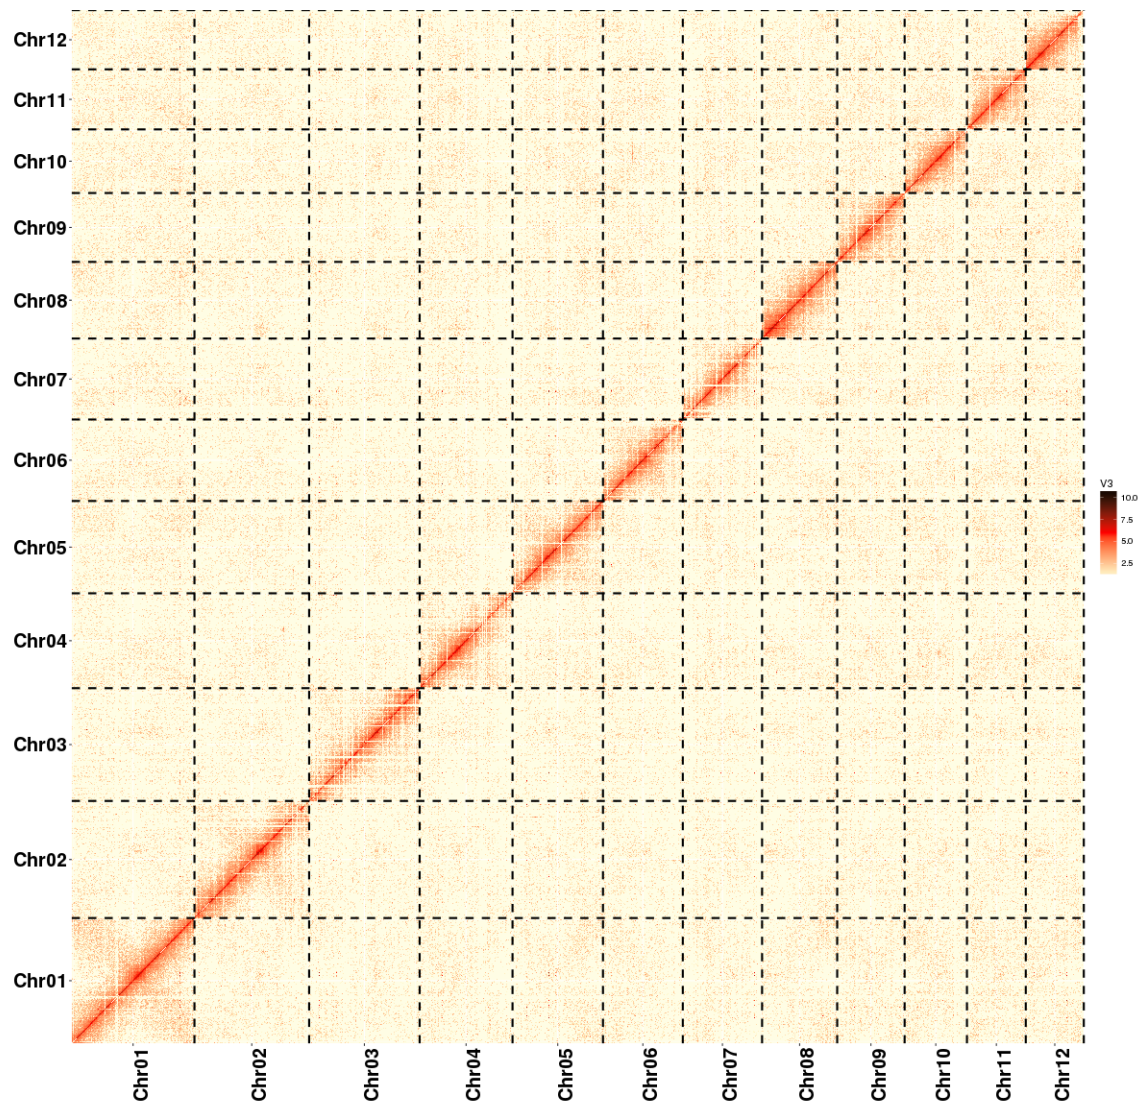

**Supplementary Figure 1. Chromatin interaction map for *C. mollissima* based on its Hi-C library.** Each group (ChrX, X=1, 2, 3, ... , 12) represents a chromosome-scale scaffold.



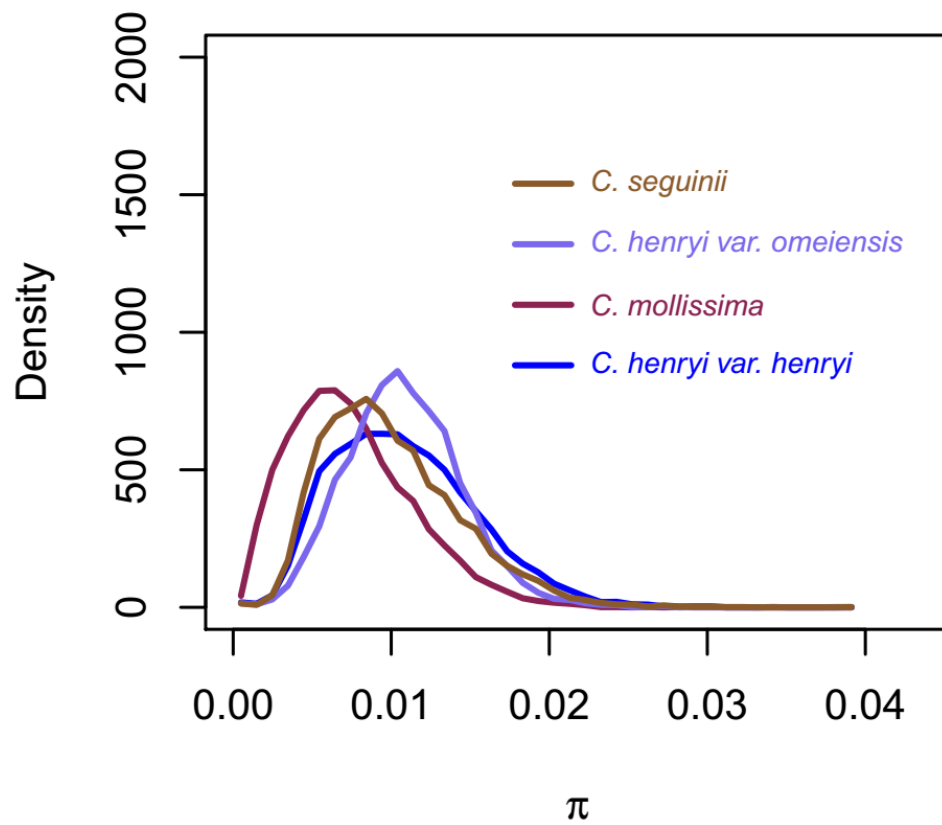

**Supplementary Figure 2. Frequency polygon of  $\pi$  per base-pair with a sliding window approach.** Window size = 100 Kbp. Source data are provided as a Source Data file.

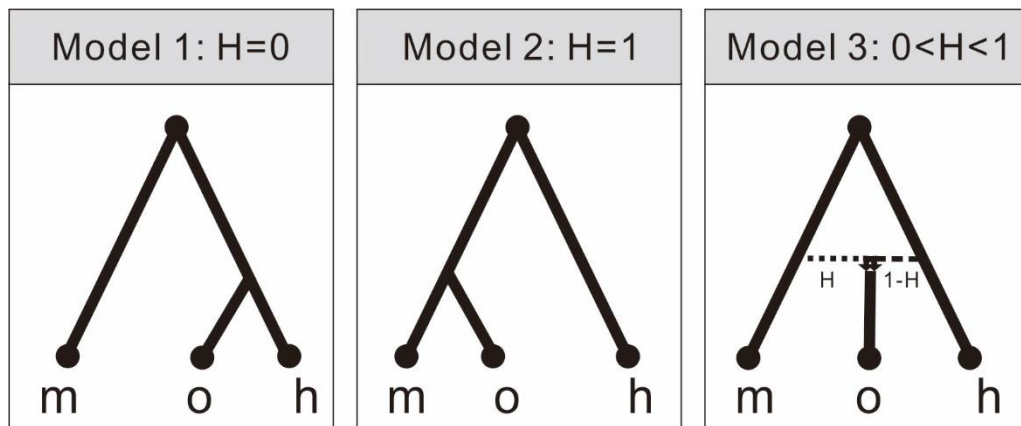

**Supplementary Figure 3. Three models representing three hypotheses for the origin of *C. henryi* var. *omeiensis* (o).** Model 3 represents the HHS hypothesis, in which the  $H$  parameter indicates the genomic contribution from *C. mollissima* (m) and the remainder ( $1-H$ ) represents the genomic contribution from *C. henryi* var. *henryi* (h).

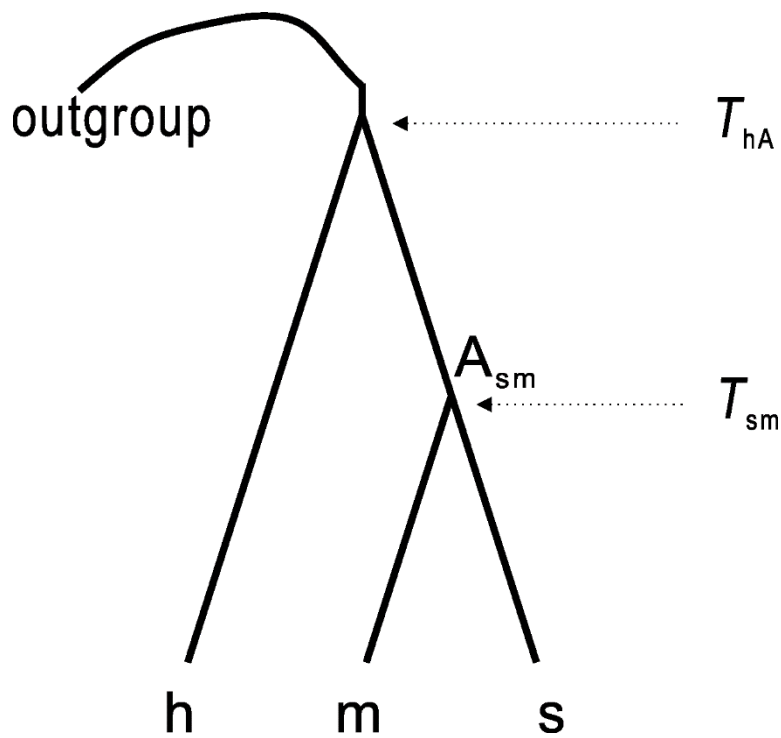

**Supplementary Figure 4. The evolutionary model used to capture the reduction of migration between h and m by utilizing the s lineage.**  $A_{sm}$  represents the ancestor of s and m. The divergence between s and m occurred at  $T_{sm}$  and the divergence between h and  $A_{sm}$  occurred at  $T_{hA}$ . *C. mollissima* = m, *C. seguinii* = s, *C. henryi* var. *henryi* = h.

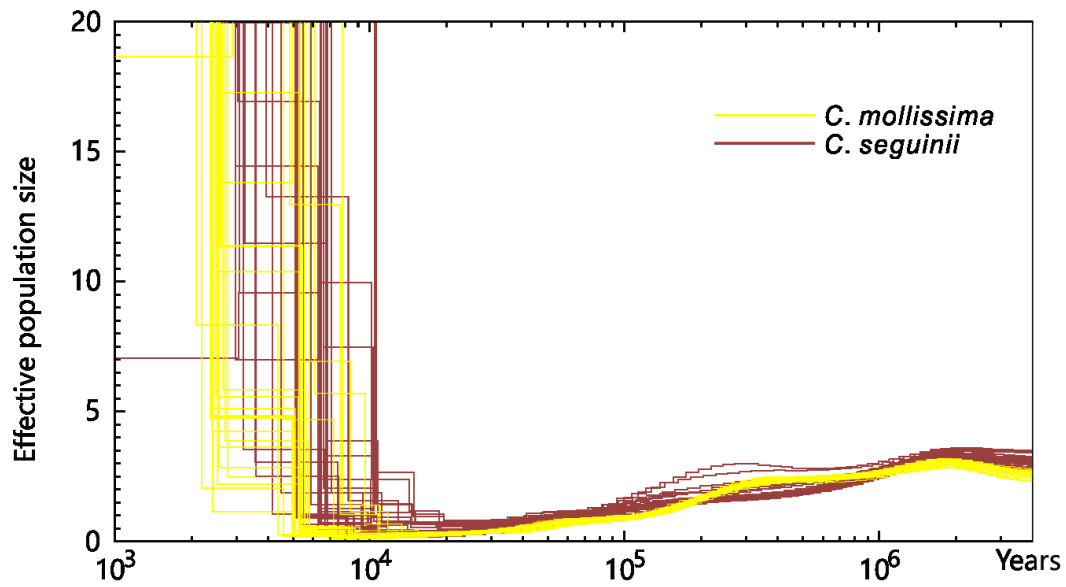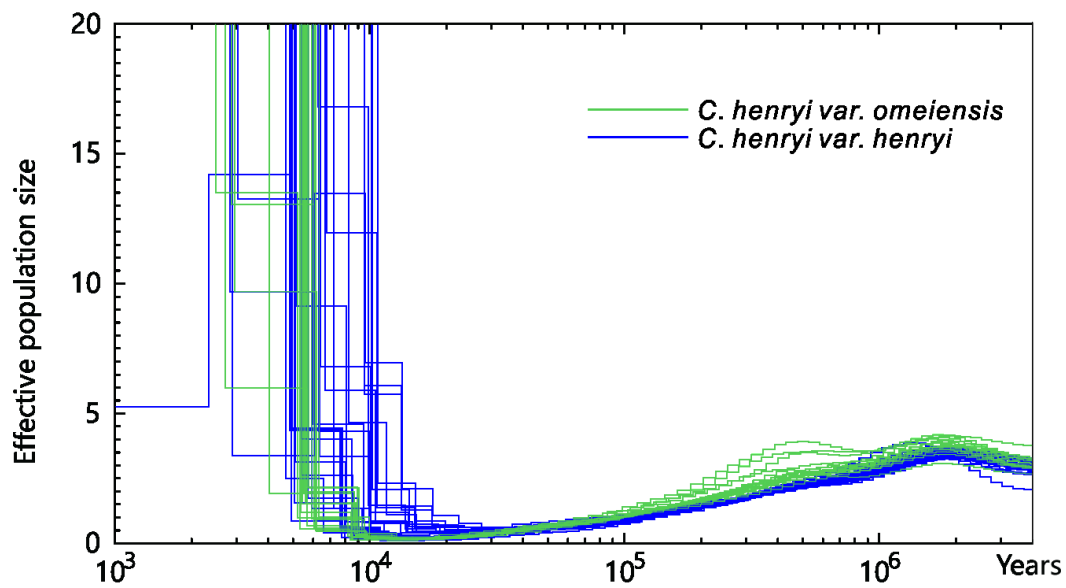

**Supplementary Figure 5. Effective population size histories estimated using the PSMC method with the *de novo* assembled reference genome for each tree of the four taxa. Source data are provided as a Source Data file.**

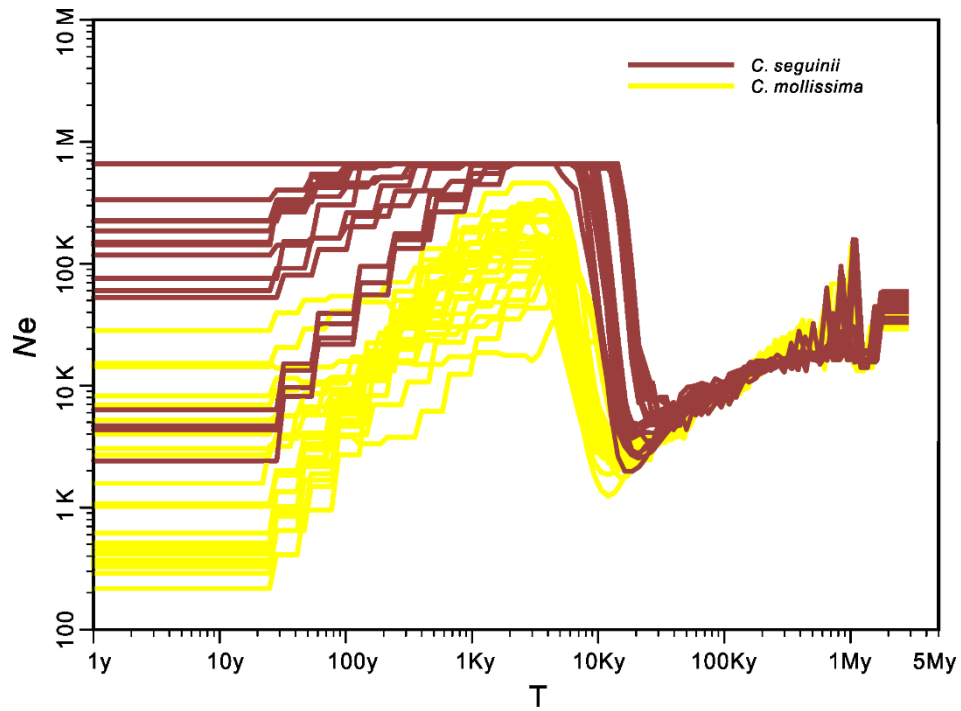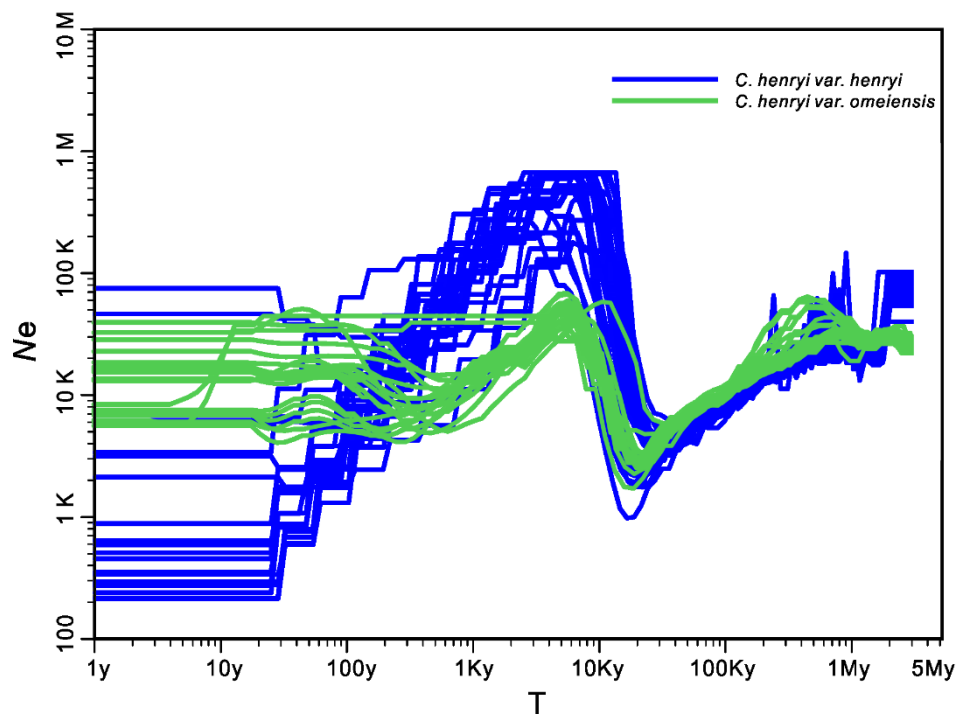

**Supplementary Figure 6. Effective population size histories estimated using the SMC++ method with the genomic sequence for each tree of the four taxa. Source data are provided as a Source Data file.**

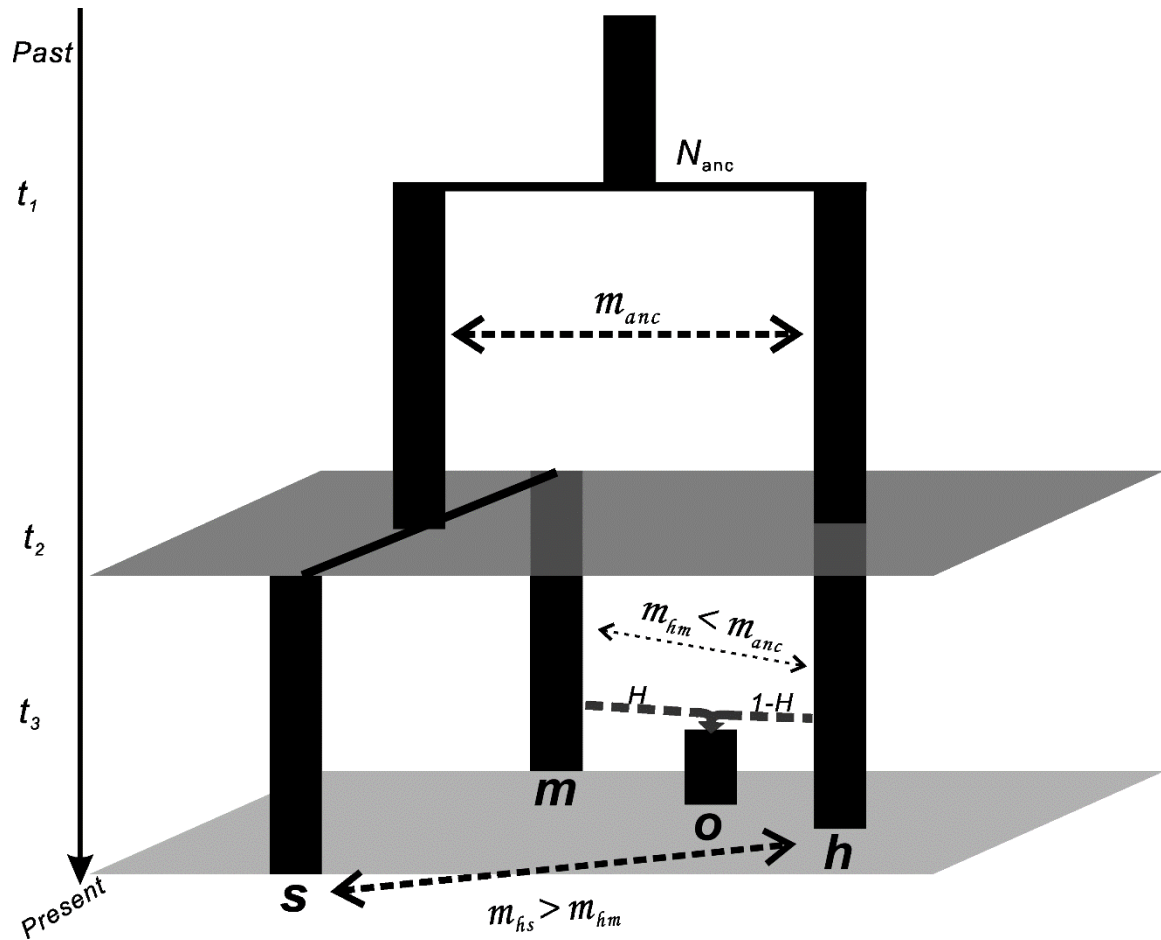

**Supplementary Figure 7. The most likely evolutionary model used in the present study.** Abbreviations are: s = *C. seguinii*, m = *C. mollissima*, h = *C. henryi* var. *henryi*, o = *C. henryi* var. *omeiensis*. At time  $t_1$ , h and the ancestral lineage of s and m diverged from an ancestral lineage with a population size of  $N_{anc}$ , which diverged from each other at time  $t_2$ . At time  $t_3$ , hybridization between m and h produced the hybrid lineage o. From  $t_1$  to  $t_2$ , the two lineages exchanged alleles with migration rate  $m_{anc}$ . The parameters  $m_{hm}$  ( $m_{hs}$ ) represent the migration rates between h and m (s) respectively after  $t_2$ . Source data are provided as a Source Data file.

## Supplementary References

- 1 Tel-Zur, N., Abbo, S., Myslabodski, D. & Mizrahi, Y. Modified CTAB Procedure for DNA Isolation from Epiphytic Cacti of the Genera *Hylocereus* and *Selenicereus* (Cactaceae). *Plant Mol. Biol. Rep.* **17**, 249-254 (1999).
- 2 Petersen, K. R., Streett, D. A., Gerritsen, A. T., Hunter, S. S. & Settles, M. L. Super deduper, fast PCR duplicate detection in fastq files. *International conference on bioinformatics*, 491-492 (2015).
- 3 Bolger, A. M., Lohse, M. & Usadel, B. Trimmomatic: a flexible trimmer for Illumina sequence data. *Bioinformatics* **30**, 2114-2120 (2014).
- 4 Leggett, R. M., Clavijo, B. J., Leah, C., Clark, M. D. & Mario, C. NextClip: an analysis and read preparation tool for Nextera Long Mate Pair libraries. *Bioinformatics* **30**, 566-568 (2014).
- 5 Marçais, G. & Kingsford, C. A fast, lock-free approach for efficient parallel counting of occurrences of k-mers. *Bioinformatics* **27**, 764 (2011).
- 6 Langmead, B. & Salzberg, S. L. Fast gapped-read alignment with Bowtie 2. *Nat. Methods* **9**, 357-359 (2012).
- 7 Servant, N. *et al.* HiC-Pro: an optimized and flexible pipeline for Hi-C data processing. *Genome Biol.* **16**, 259-270 (2015).
- 8 Burton, J. N. *et al.* Chromosome-scale scaffolding of de novo genome assemblies based on chromatin interactions. *Nat. Biotechnol.* **31**, 1119-1125 (2013).
- 9 Tarailo-Graovac, M. & Chen, N. Using RepeatMasker to identify repetitive elements in genomic sequences. *Curr. Protoc. Bioinform.* **25**, 4.10. 11-14.10. 14 (2009).
- 10 Hubley, R. *et al.* The Dfam database of repetitive DNA families. *Nucleic Acids Res.* **44**, D81-D89 (2016).
- 11 Bao, W., Kojima, K. K. & Kohany, O. Repbase Update, a database of repetitive elements in eukaryotic genomes. *Mobile DNA* **6**, 11 (2015).
- 12 Xu, Z. & Wang, H. LTR\_FINDER: an efficient tool for the prediction of full-length LTR retrotransposons. *Nucleic Acids Res.* **35**, W265-W268 (2007).
- 13 Ellinghaus, D., Kurtz, S. & Willhoeft, U. LTRharvest, an efficient and flexible software for de novo detection of LTR retrotransposons. *BMC Bioinformatics* **9**, 18 (2008).
- 14 Ou, S. & Jiang, N. LTR\_retriever: a highly accurate and sensitive program for identification of long terminal repeat retrotransposons. *Plant Physiol.* **176**, 1410-1422 (2018).
- 15 Quinlan, A. R. BEDTools: the Swiss-army tool for genome feature analysis. *Curr. Protoc. Bioinform.* **47**, 11.12. 11-11.12. 34 (2014).

- 16 Stanke, M., Diekhans, M., Baertsch, R. & Haussler, D. Using native and syntenically mapped cDNA alignments to improve de novo gene finding. *Bioinformatics* **24**, 637-644 (2008).
- 17 Stanke, M. *et al.* AUGUSTUS: ab initio prediction of alternative transcripts. *Nucleic Acids Res.* **34**, W435-W439 (2006).
- 18 Majoros, W. H., Pertea, M. & Salzberg, S. L. TigrScan and GlimmerHMM: two open source ab initio eukaryotic gene-finders. *Bioinformatics* **20**, 2878-2879 (2004).
- 19 Lomsadze, A., Burns, P. D. & Borodovsky, M. Integration of mapped RNA-Seq reads into automatic training of eukaryotic gene finding algorithm. *Nucleic Acids Res.* **42**, e119-e119 (2014).
- 20 Keilwagen, J., Hartung, F. & Grau, J. in *Gene Prediction* (ed Kollmar M.) 161-177 (Springer, 2019).
- 21 Haas, B. J. *et al.* De novo transcript sequence reconstruction from RNA-seq using the Trinity platform for reference generation and analysis. *Nat. Protoc.* **8**, 1494-1512 (2013).
- 22 Gremme, G., Brendel, V., Sparks, M. E. & Kurtz, S. Engineering a software tool for gene structure prediction in higher organisms. *Inform. Software Tech.* **47**, 965-978 (2005).
- 23 Kim, D., Paggi, J. M., Park, C., Bennett, C. & Salzberg, S. L. Graph-based genome alignment and genotyping with HISAT2 and HISAT-genotype. *Nat. Biotechnol.* **37**, 907-915 (2019).
- 24 Haas, B. J. *et al.* Automated eukaryotic gene structure annotation using EVIDENCEModeler and the Program to Assemble Spliced Alignments. *Genome Biol.* **9**, R7 (2008).
- 25 Xing, Y. *et al.* Hybrid de novo genome assembly of Chinese chestnut (*Castanea mollissima*). *GigaScience* **8**, giz112 (2019).
- 26 Chan, A. H., Jenkins, P. A. & Song, Y., S. Genome-wide fine-scale recombination rate variation in *Drosophila melanogaster*. *PLoS Genet.* **8**, e1003090 (2012).
